# Supplementary material for: Experimental discovery of novel ammonia synthesis catalysts via active learning
Source: Royal Society of Chemistry journal article supplement (doi:10.1039/d3ta05939a), 2024-01-01
Supplement: d3ta05939a1.pdf [file d3ta05939a1.pdf]

## Supplementary Information

### Experimental Discovery of Novel Ammonia Synthesis Catalysts *via* Active Learning

Rasika Jayarathna<sup>1</sup>, Thossaporn Onsree<sup>1</sup>, Samuel Drummond<sup>1</sup>, Jennifer Naglic<sup>1</sup>, Jochen Lauterbach<sup>1, \*</sup>

<sup>1</sup>Department of Chemical Engineering, University of South Carolina, 541 Main St.

Columbia, SC 29208, USA

\*Corresponding Author: [lauteraj@cec.sc.edu](mailto:lauteraj@cec.sc.edu)

Table S1. Initial features used for data mining.

| Feature Category             | Feature                                               | Unit                           |
|------------------------------|-------------------------------------------------------|--------------------------------|
| <b>Active metal/Promoter</b> | Ru metal loading                                      | wt%                            |
|                              | Ru precursor                                          | -                              |
|                              | Promoter 1                                            | -                              |
|                              | Promoter 1 precursor                                  | -                              |
|                              | Promoter 1 loading                                    | wt%                            |
|                              | Promoter 2                                            | -                              |
|                              | Promoter 2 precursor                                  | -                              |
|                              | Promoter 2 loading                                    | wt%                            |
| <b>Support</b>               | Support                                               | -                              |
|                              | BET surface area                                      | m <sup>2</sup> g <sup>-1</sup> |
| <b>Support pretreatment</b>  | H <sub>2</sub> in the support pretreatment (step 1)   | vol%                           |
|                              | O <sub>2</sub> in the support pretreatment (step 1)   | vol%                           |
|                              | Support pretreatment temperature (step 1)             | K                              |
|                              | Support pretreatment time (step 1)                    | h                              |
|                              | H <sub>2</sub> in the support pretreatment (step 2)   | vol%                           |
|                              | O <sub>2</sub> in the support pretreatment (step 2)   | vol%                           |
|                              | H <sub>2</sub> O in the support pretreatment (step 2) | vol%                           |
|                              | CO <sub>2</sub> in the support pretreatment (step 2)  | vol%                           |
|                              | Support pretreatment                                  | K                              |

|                              |                                                                   |                                                   |
|------------------------------|-------------------------------------------------------------------|---------------------------------------------------|
|                              | temperature (step 2)                                              |                                                   |
|                              | Support pretreatment time (step 2)                                | h                                                 |
|                              | H <sub>2</sub> in the support pretreatment (step 3)               | vol%                                              |
|                              | Support pretreatment temperature (step 3)                         | K                                                 |
|                              | Support pretreatment time (step 3)                                | h                                                 |
| <b>Catalyst pretreatment</b> | H <sub>2</sub> in catalyst pretreatment medium mean               | vol%                                              |
|                              | H <sub>2</sub> in catalyst pretreatment medium standard deviation | vol%                                              |
|                              | Catalyst pretreatment temperature mean                            | K                                                 |
|                              | Catalyst pretreatment temperature standard deviation              | K                                                 |
|                              | Catalyst pretreatment time mean                                   | h                                                 |
|                              | Catalyst pretreatment time standard deviation                     | h                                                 |
| <b>Reaction conditions</b>   | H <sub>2</sub> /N <sub>2</sub> ratio                              | -                                                 |
|                              | Initial ammonia concentration                                     | vol%                                              |
|                              | Space velocity                                                    | ml h <sup>-1</sup> g <sub>cat</sub> <sup>-1</sup> |
|                              | Reaction pressure                                                 | MPa                                               |
|                              | Reaction temperature                                              | K                                                 |

Table S2. Distribution of datapoints based on promoter and support combined.

| <b>Catalyst group name</b>                      | <b>Number of data points</b> |
|-------------------------------------------------|------------------------------|
| Ru/CeO <sub>2</sub>                             | 89                           |
| Ru/MgO                                          | 87                           |
| Ru,Cs/MgO                                       | 75                           |
| Ru/Pr <sub>2</sub> O <sub>3</sub>               | 63                           |
| Ru,Cs/ $\alpha$ -Al <sub>2</sub> O <sub>3</sub> | 58                           |
| Ru,K/Graphite                                   | 49                           |
| Ru,K/C-pyrolytic                                | 40                           |
| Ru,Ba/C-pyrolytic                               | 34                           |
| Ru,Ba/MgO                                       | 28                           |
| Ru/BaCeO <sub>3</sub>                           | 26                           |
| Ru,Li/Graphite                                  | 24                           |
| Ru,Na/Graphite                                  | 18                           |
| Ru/ $\alpha$ -Al <sub>2</sub> O <sub>3</sub>    | 17                           |
| Ru,Ba/Graphite                                  | 16                           |
| Ru,Rh,K/C-pyrolytic                             | 16                           |
| Ru,Cs/Graphite                                  | 16                           |

| Catalyst group name                                  | Number of data points |
|------------------------------------------------------|-----------------------|
| Ru,Co,K/C-pyrolytic                                  | 16                    |
| Ru,Ir,K/C-pyrolytic                                  | 16                    |
| Ru,Cs/Sr <sub>2</sub> Nb <sub>2</sub> O <sub>7</sub> | 15                    |
| Ru,K/MgO                                             | 15                    |
| Ru,Cs/BaCeO <sub>3</sub>                             | 14                    |
| Ru,Ba,Cs/Graphite                                    | 14                    |
| Ru,Ba/Sr <sub>2</sub> Nb <sub>2</sub> O <sub>7</sub> | 12                    |
| Ru,Ba/ $\gamma$ -Al <sub>2</sub> O <sub>3</sub>      | 12                    |
| Ru/MgFe <sub>2</sub> O <sub>4</sub>                  | 11                    |
| Ru/Sm <sub>2</sub> O <sub>3</sub>                    | 10                    |
| Ru,Ba/MgAl <sub>2</sub> O <sub>4</sub>               | 10                    |
| Ru,Rb/MgO                                            | 8                     |
| Ru,Ce/C-pyrolytic                                    | 6                     |
| Ru,B,Cs/MgO                                          | 5                     |
| Ru/Sr <sub>2</sub> Nb <sub>2</sub> O <sub>7</sub>    | 5                     |
| Ru/La <sub>2</sub> O <sub>3</sub>                    | 5                     |
| Ru/MgAl <sub>2</sub> O <sub>4</sub>                  | 5                     |
| Ru,Cs/C-pyrolytic                                    | 5                     |
| Ru,Gd/MgO                                            | 5                     |
| Ru,Ba/ $\alpha$ -Al <sub>2</sub> O <sub>3</sub>      | 5                     |
| Ru,La/MgO                                            | 5                     |
| Ru,Ce/MgO                                            | 5                     |
| Ru,Pr/MgO                                            | 5                     |
| Ru,Nd/MgO                                            | 5                     |
| Ru,Dy/MgO                                            | 5                     |
| Ru,Ba/ $\theta$ -Al <sub>2</sub> O <sub>3</sub>      | 5                     |
| Ru,K/BaCeO <sub>3</sub>                              | 4                     |
| Ru/Nd <sub>2</sub> O <sub>3</sub>                    | 4                     |
| Ru/ $\gamma$ -Al <sub>2</sub> O <sub>3</sub>         | 4                     |
| Ru,Ba/BaCeO <sub>3</sub>                             | 4                     |
| Ru,Sm/MgO                                            | 4                     |
| Ru/Gd <sub>2</sub> O <sub>3</sub>                    | 4                     |
| Ru/Tb <sub>2</sub> O <sub>3</sub>                    | 4                     |
| Ru/Ho <sub>2</sub> O <sub>3</sub>                    | 4                     |
| Ru,Na/MgO                                            | 4                     |
| Ru/Yb <sub>2</sub> O <sub>3</sub>                    | 4                     |
| Ru/Er <sub>2</sub> O <sub>3</sub>                    | 4                     |
| Ru/BaZrO <sub>3</sub>                                | 3                     |
| Ru,Sr/MgO                                            | 3                     |
| Ru,Ca/MgO                                            | 3                     |
| Ru/BaTiO <sub>3</sub>                                | 3                     |

Table S3. Elemental properties used to generate elemental features.

| <b>Properties from Magpie dataset <sup>1</sup> in Python package matminer (version 0.8.0) <sup>2</sup></b> |                                     |
|------------------------------------------------------------------------------------------------------------|-------------------------------------|
| Atomic Radius                                                                                              | Number of f-shell Valence Electrons |
| Atomic Volume                                                                                              | Number of p-shell Valence Electrons |
| Atomic Weight                                                                                              | Number of s-shell Valence Electrons |
| Boiling Temperature                                                                                        | Number of Valence Electrons         |
| Column Number                                                                                              | Polarizability                      |
| Covalent Radius                                                                                            | Row Number                          |
| Density                                                                                                    | Space group Number                  |
| Electron Affinity                                                                                          | Thermal Conductivity                |
| Electronegativity                                                                                          | Cohesive Energy                     |
| Ground State Energy                                                                                        | 1 <sup>st</sup> Ionization Energy   |
| Heat Capacity (Molar)                                                                                      | 2 <sup>nd</sup> Ionization Energy   |
| Heat of Fusion                                                                                             | 3 <sup>rd</sup> Ionization Energy   |
| Heat of Vaporization                                                                                       | 4 <sup>th</sup> Ionization Energy   |
| Melting Temperature                                                                                        | 5 <sup>th</sup> Ionization Energy   |
| Mendelev Number                                                                                            | 6 <sup>th</sup> Ionization Energy   |
| Molar Volume                                                                                               | 7 <sup>th</sup> Ionization Energy   |
| Number of d-shell Valence Electrons                                                                        | 8 <sup>th</sup> Ionization Energy   |
| <b>Properties from Python package matminer (version 0.8.0) <sup>2</sup></b>                                |                                     |
| Band Center (band center estimated based on atomic orbitals)                                               |                                     |
| Valence Orbital Energy                                                                                     |                                     |
| <b>Properties from other sources</b>                                                                       |                                     |
| Work Function <sup>3</sup>                                                                                 |                                     |
| Log Electrical Conductivity <sup>4</sup>                                                                   |                                     |
| Bulk Modulus <sup>5-9</sup>                                                                                |                                     |
| Shear Modulus <sup>5-9</sup>                                                                               |                                     |

Table S4. Extra features considered for the support.

| <b>Features from Python package matminer (version 0.8.0) <sup>2</sup></b> |  |  |
|---------------------------------------------------------------------------|--|--|
| HOMO energy (HOMO energy estimated based on atomic orbitals)              |  |  |
| LUMO energy (LUMO energy estimated based on atomic orbitals)              |  |  |
| gap AO (band gap estimated based on atomic orbitals)                      |  |  |
| <b>Properties from materials project <sup>10</sup></b>                    |  |  |
| Formation enthalpy                                                        |  |  |
| Band gap (DFT calculated)                                                 |  |  |
| Density                                                                   |  |  |

Table S5. Material ID numbers for material project database <sup>10</sup>.

| <b>Support</b>   | <b>ID number</b> | <b>Selection</b>         |
|------------------|------------------|--------------------------|
| MgO              | mp-1265          | Based on cubic structure |
| CeO <sub>2</sub> | mp-20194         | Based on cubic structure |

| Support                                        | ID number | Selection                                                                        |
|------------------------------------------------|-----------|----------------------------------------------------------------------------------|
| BaCeO <sub>3</sub>                             | mp-3187   | Based on reported structure <sup>11</sup>                                        |
| Pr <sub>2</sub> O <sub>3</sub>                 | mp-16705  | Based on reported structure <sup>12, 13</sup>                                    |
| Sr <sub>2</sub> Nb <sub>2</sub> O <sub>7</sub> | mp-3870   | Based on reported structure <sup>14</sup>                                        |
| MgAl <sub>2</sub> O <sub>4</sub>               | mp-3536   | Based on cubic structure                                                         |
| La <sub>2</sub> O <sub>3</sub>                 | mp-2292   | Based on reported structure <sup>13</sup>                                        |
| Sm <sub>2</sub> O <sub>3</sub>                 | mp-218    | Based on reported structure <sup>13</sup>                                        |
| Ho <sub>2</sub> O <sub>3</sub>                 | mp-812    | Based on reported structure <sup>13</sup>                                        |
| Er <sub>2</sub> O <sub>3</sub>                 | mp-679    | Based on reported structure <sup>13</sup>                                        |
| Tb <sub>2</sub> O <sub>3</sub>                 | mp-1056   | Based on reported structure <sup>13</sup>                                        |
| Gd <sub>2</sub> O <sub>3</sub>                 | mp-504886 | Based on reported structure <sup>13</sup>                                        |
| Nd <sub>2</sub> O <sub>3</sub>                 | mp-1045   | Based on reported structure <sup>13</sup>                                        |
| Yb <sub>2</sub> O <sub>3</sub>                 | mp-2814   | Based on reported structure <sup>13</sup>                                        |
| BaZrO <sub>3</sub>                             | mp-3834   | Based on reported structure <sup>15</sup>                                        |
| C(pyrolytic)                                   | mp-47     | Based on formation enthalpy and band gap of pyrolytic carbon                     |
| Graphite                                       | mp-48     | Based on hexagonal structure, formation enthalpy and band gap (0 eV) of graphite |
| γ-Al <sub>2</sub> O <sub>3</sub>               | mp-776475 | Approximation based on crystal structure                                         |
| θ-Al <sub>2</sub> O <sub>3</sub>               | mp-7048   | Based on space group of θ-Al <sub>2</sub> O <sub>3</sub>                         |
| α-Al <sub>2</sub> O <sub>3</sub>               | mp-1143   | Based on space group of α-Al <sub>2</sub> O <sub>3</sub>                         |
| MgFe <sub>2</sub> O <sub>4</sub>               | mp-608016 | Based on reported structure <sup>16</sup>                                        |
| BaTiO <sub>3</sub>                             | mp-19990  | Based on reported structure <sup>17</sup>                                        |

Table S6. Optimal hyperparameters for ETR, RFR, and XGB models

| Algorithm | Hyperparameters        | Range     | Optimal Values   |
|-----------|------------------------|-----------|------------------|
| ETR       | criterion              | -         | squared error    |
|           | n_estimators           | 25-1000   | 750              |
|           | max_depth              | None-200  | 25               |
|           | min_samples_leaf       | 2-5       | 2                |
|           | min_samples_split      | 2-5       | 2                |
| RFR       | criterion              | -         | squared error    |
|           | n_estimators           | 25-500    | 125              |
|           | max_depth              | None-200  | 25               |
|           | min_samples_leaf       | 2-5       | 2                |
|           | min_samples_split      | 2-5       | 5                |
| XGB       | objective              | -         | reg:squarederror |
|           | learning_rate          | 0.01-0.60 | 0.50             |
|           | max_depth              | 5-200     | 10               |
|           | tweedie_variance_power | 1.2-1.8   | 1.7              |

Table S7. Features selected using Boruta method.

|                                                                                                                                                                                                                                                                                                                                                                                                                                                                                                                                                                                                                                                                                                                                                                                                                                                                                                                                                                                                                                                                                                                                                                                                                                        |
|----------------------------------------------------------------------------------------------------------------------------------------------------------------------------------------------------------------------------------------------------------------------------------------------------------------------------------------------------------------------------------------------------------------------------------------------------------------------------------------------------------------------------------------------------------------------------------------------------------------------------------------------------------------------------------------------------------------------------------------------------------------------------------------------------------------------------------------------------------------------------------------------------------------------------------------------------------------------------------------------------------------------------------------------------------------------------------------------------------------------------------------------------------------------------------------------------------------------------------------|
| <b>Kinetics and Thermodynamics</b>                                                                                                                                                                                                                                                                                                                                                                                                                                                                                                                                                                                                                                                                                                                                                                                                                                                                                                                                                                                                                                                                                                                                                                                                     |
| Initial H <sub>2</sub> partial pressure, Initial N <sub>2</sub> partial pressure, Initial NH <sub>3</sub> partial pressure, Equilibrium constant, Thermodynamic limit, Temperature, Space velocity, H <sub>2</sub> /N <sub>2</sub> ratio, Total pressure                                                                                                                                                                                                                                                                                                                                                                                                                                                                                                                                                                                                                                                                                                                                                                                                                                                                                                                                                                               |
| <b>Catalyst Pretreatment</b>                                                                                                                                                                                                                                                                                                                                                                                                                                                                                                                                                                                                                                                                                                                                                                                                                                                                                                                                                                                                                                                                                                                                                                                                           |
| Catalyst pretreatment temperature mean, Catalyst pretreatment temperature s.t.d., Catalyst pretreatment time mean, Catalyst pretreatment time s.t.d., H <sub>2</sub> % in Catalyst pretreatment medium mean                                                                                                                                                                                                                                                                                                                                                                                                                                                                                                                                                                                                                                                                                                                                                                                                                                                                                                                                                                                                                            |
| <b>Catalyst Preparation</b>                                                                                                                                                                                                                                                                                                                                                                                                                                                                                                                                                                                                                                                                                                                                                                                                                                                                                                                                                                                                                                                                                                                                                                                                            |
| Precursor carbon mol, Precursor CO ligands mol, Precursor chlorine mol, Precursor anionic O mol, Precursor NO <sub>x</sub> mol, CO <sub>2</sub> % in support pretreatment (step 2), Support pretreatment temperature (step 1), Support pretreatment temperature (step 2), Support pretreatment time (step 1), Support pretreatment time (step 2), BET support surface area                                                                                                                                                                                                                                                                                                                                                                                                                                                                                                                                                                                                                                                                                                                                                                                                                                                             |
| <b>Metal-promoter interactions: elemental features</b>                                                                                                                                                                                                                                                                                                                                                                                                                                                                                                                                                                                                                                                                                                                                                                                                                                                                                                                                                                                                                                                                                                                                                                                 |
| Alkali metal to Ru molar ratio, Alkaline earth metal to Ru molar ratio, Metal atomic radius m.a.d., Metal atomic volume m.a.d., Metal band center m.a.d., Metal boiling temperature m.a.d., Metal melting temperature m.a.d., Metal melting temperature mean, Metal covalent radius m.a.d., Metal covalent radius mean, Metal density m.a.d., Metal electron affinity mean, Metal ground state energy m.a.d., Metal ground state energy mean, Metal 1 <sup>st</sup> ionization energy m.a.d., Metal 1 <sup>st</sup> ionization energy mean, Metal 2 <sup>nd</sup> ionization energy mean, Metal 3 <sup>rd</sup> ionization energy mean, Metal 6 <sup>th</sup> ionization energy mean, Metal 7 <sup>th</sup> ionization energy mean, Metal log electrical conductivity m.a.d., Metal log electrical conductivity mean, Metal molar volume m.a.d., Metal molar volume mean, Metal polarizability m.a.d., Metal space group number mean, Metal thermal conductivity m.a.d., Metal thermal conductivity mean, Metal cohesive energy m.a.d.                                                                                                                                                                                                 |
| <b>Support: elemental properties</b>                                                                                                                                                                                                                                                                                                                                                                                                                                                                                                                                                                                                                                                                                                                                                                                                                                                                                                                                                                                                                                                                                                                                                                                                   |
| Support band center, Support HOMO energy, Support valence orbital energy, Support atomic radius mean, Support atomic radius m.a.d., Support band center mean, Support band center m.a.d., Support bulk modulus mean, Support column mean, Support covalent radius m.a.d., Support covalent radius mean, Support electronegativity m.a.d., Support electronegativity mean, Support 1 <sup>st</sup> ionization energy mean, Support 1 <sup>st</sup> ionization energy m.a.d., Support 2 <sup>nd</sup> ionization energy mean, Support 6 <sup>th</sup> ionization energy m.a.d., Support Mendeleev number m.a.d., Support Mendeleev number mean, Support num. of valence electrons m.a.d., Support num. of p electrons mean, Support polarizability m.a.d., Support polarizability mean, Support valence orbital energy mean, Support metal atomic radius mean, Support metal bulk modulus mean, Support metal electronegativity mean, Support metal 1 <sup>st</sup> ionization energy mean, Support metal 2 <sup>nd</sup> ionization energy mean, Support metal 7 <sup>th</sup> ionization energy mean, Support metal 8 <sup>th</sup> ionization energy mean, Support metal Mendeleev number mean, Support metal space group number mean |

---

**Support electronic properties: density of states**

---

Support cbm hybridization, Support cbm location 1\_2, Support cbm sp, Support vbm hybridization, Support vbm location 1\_2, Support cbm location 1\_3, Support vbm score 1

---

**Metal-support interaction (MSI) compounds: elemental properties**

---

Ru to support molar ratio, MSI atomic number m.a.d., MSI atomic weight m.a.d., MSI band center m.a.d., MSI 1<sup>st</sup> ionization energy m.a.d., MSI 2<sup>nd</sup> ionization energy m.a.d., MSI 8<sup>th</sup> ionization energy m.a.d., MSI Mendeleev number mean, MSI Mendeleev number m.a.d., MSI polarizability m.a.d.

---

**Promoter-support interaction: elemental features**

---

Alkali metal to support molar ratio, Promoter-support atomic number m.a.d., Promoter-support atomic radius m.a.d., Promoter-support atomic radius mean, Promoter-support atomic volume m.a.d., Promoter-support atomic weight m.a.d., Promoter-support band center m.a.d., Promoter-support bulk modulus m.a.d., Promoter-support bulk modulus mean, Promoter-support boiling temperature m.a.d., Promoter-support column number m.a.d.,  
, Promoter-support covalent radius m.a.d., Promoter-support covalent radius mean, Promoter-support density m.a.d., Promoter-support density mean, Promoter-support electron affinity m.a.d., Promoter-support electronegativity m.a.d., Promoter-support electronegativity mean, Promoter-support ground state energy m.a.d., Promoter-support molar heat capacity m.a.d., Promoter-support heat of fusion m.a.d.,  
Promoter-support heat of vaporization m.a.d., Promoter-support 1<sup>st</sup> ionization energy m.a.d., Promoter-support 2<sup>nd</sup> ionization energy m.a.d., Promoter-support 2<sup>nd</sup> ionization energy mean, Promoter-support 3<sup>rd</sup> ionization energy m.a.d., Promoter-support 5<sup>th</sup> ionization energy m.a.d., Promoter-support 6<sup>th</sup> ionization energy m.a.d., Promoter-support 6<sup>th</sup> ionization energy mean, Promoter-support 7<sup>th</sup> ionization energy m.a.d., Promoter-support 7<sup>th</sup> ionization energy mean, Promoter-support 8<sup>th</sup> ionization energy m.a.d., Promoter-support 8<sup>th</sup> ionization energy mean, Promoter-support log electrical conductivity m.a.d., Promoter-support melting temperature m.a.d., Promoter-support Mendeleev number m.a.d., Promoter-support Mendeleev number mean, Promoter-support molar volume m.a.d., Promoter-support num. of valence electrons m.a.d., Promoter-support num. of valence electrons mean, Promoter-support num. of d valence electrons m.a.d., Promoter-support num. of d valence electrons mean, Promoter-support num. of f valence electrons m.a.d., Promoter-support num. of s valence electrons m.a.d., Promoter-support num. of s valence electrons mean, Promoter-support polarizability m.a.d.,  
Promoter-support polarizability mean, Promoter-support row number m.a.d., Promoter-support shear modulus m.a.d., Promoter-support shear modulus mean, Promoter-support thermal conductivity m.a.d.,  
Promoter-support work function m.a.d., Promoter-support cohesive energy m.a.d.

---

s.t.d.: standard deviation, HOMO: Highest occupied molecular orbital, m.a.d.: mean absolute deviation

---

Table S8. Ammonia synthesis activity dataset (Experimentally measured) of the Ru, Promoter (M), Cs/Pr<sub>2</sub>O<sub>3</sub> catalysts used for active learning. Reaction Conditions (3 MPa, 673 K, 36000 mL h<sup>-1</sup> g<sub>cat</sub><sup>-1</sup>, H<sub>2</sub> to N<sub>2</sub> ratio of 1:1)

| Promoter (M) | Precursor       | Ammonia Synthesis Rate (mmol g <sup>-1</sup> <sub>Ru</sub> h <sup>-1</sup> ) |
|--------------|-----------------|------------------------------------------------------------------------------|
| Ga           | nitrate         | 0.001                                                                        |
| Sm           | nitrate         | 24.3                                                                         |
| Y            | nitrate         | 27.6                                                                         |
| Yb           | nitrate         | 26.6                                                                         |
| Nd           | nitrate         | 21.1                                                                         |
| Ca           | nitrate         | 23.7                                                                         |
| Hf           | acetylacetonate | 30.1                                                                         |
| Mg           | nitrate         | 24.5                                                                         |
| Ba           | nitrate         | 48.8                                                                         |
| K            | acetate         | 33.2                                                                         |
| Rb           | acetate         | 30.2                                                                         |
| Na           | acetate         | 6.7                                                                          |
| Sn           | acetate         | 3.3                                                                          |
| Sr           | nitrate         | 32.6                                                                         |
| Li           | acetate         | 2.6                                                                          |
| Eu           | nitrate         | 34.3                                                                         |
| Mn           | nitrate         | 3                                                                            |
| Sc           | acetate         | 31.4                                                                         |
| In           | nitrate         | 2.6                                                                          |
| Al           | nitrate         | 11.1                                                                         |
| V            | acetylacetonate | 6.3                                                                          |
| Cr           | nitrate         | 16.8                                                                         |
| Lu           | nitrate         | 39.4                                                                         |
| Tb           | nitrate         | 24.6                                                                         |
| Tm           | nitrate         | 22.5                                                                         |
| Fe           | nitrate         | 6                                                                            |
| Ir           | acetate         | 17.2                                                                         |
| Ag           | nitrate         | 21.1                                                                         |
| Ho           | nitrate         | 26.6                                                                         |
| Zn           | acetate         | 0.001                                                                        |
| La           | nitrate         | 21.1                                                                         |
| Ce           | nitrate         | 22.3                                                                         |
| Co           | nitrate         | 24.6                                                                         |
| Gd           | nitrate         | 35.7                                                                         |
| Cd           | nitrate         | 27.4                                                                         |
| Ni           | nitrate         | 11.5                                                                         |
| Er           | nitrate         | 24.9                                                                         |
| Pb           | nitrate         | 0.001                                                                        |
| Zr           | oxynitrate      | 19.1                                                                         |
| Re           | perrhenate      | 23.2                                                                         |
| Bi           | nitrate         | 0.001                                                                        |
| Dy           | nitrate         | 44.5                                                                         |



Table S9. Comparison of the activity of the best catalysts found in this study with some state-of-the-art catalysts in the literature.

| Catalyst                                                 | Ru (wt %) | T (K) | P (MPa) | Space velocity (ml g <sup>-1</sup> <sub>cat</sub> h <sup>-1</sup> ) | H <sub>2</sub> /N <sub>2</sub> | NH <sub>3</sub> synthesis rate (mmol g <sup>-1</sup> <sub>Ru</sub> h <sup>-1</sup> ) | Reference |
|----------------------------------------------------------|-----------|-------|---------|---------------------------------------------------------------------|--------------------------------|--------------------------------------------------------------------------------------|-----------|
| Ru, Ba, Cs/Pr <sub>2</sub> O <sub>3</sub>                | 1         | 673   | 3       | 36000                                                               | 1                              | 4880                                                                                 | This work |
| Ru, Dy, Cs/Pr <sub>2</sub> O <sub>3</sub>                | 1         | 673   | 3       | 36000                                                               | 1                              | 4450                                                                                 | This work |
| Ru/Pr <sub>2</sub> O <sub>3</sub>                        | 5         | 673   | 3       | 72000                                                               | 1                              | 1820                                                                                 | 12        |
| Ru/C <sub>12</sub> A <sub>7</sub> :e <sup>-</sup>        | 0.3       | 673   | 1       | 18000                                                               | 3                              | 1229                                                                                 | 18        |
| Ba, Ru/BN                                                | 4.5       | 673   | 10      | -                                                                   | 3                              | 4147                                                                                 | 19        |
| Ru-Co DSAC                                               | 0.92      | 673   | 1       | 60000                                                               | 3                              | 2598                                                                                 | 20        |
| Ru/BaTiO <sub>2.5</sub> H <sub>0.5</sub>                 | 0.9       | 673   | 5       | 59400                                                               | 3                              | 3133                                                                                 | 21        |
| Ru/3LaN/ZrH <sub>2</sub>                                 | 2         | 673   | 1       | 60000                                                               | 3                              | 625                                                                                  | 22        |
| Ru, Cs/BaCeO <sub>3</sub>                                | 1.25      | 723   | 3       | 24000                                                               | 3                              | 2240                                                                                 | 11        |
| Ru/La <sub>0.5</sub> Ce <sub>0.5</sub> O <sub>1.75</sub> | 5         | 673   | 1       | 72000                                                               | 3                              | 1286                                                                                 | 23        |
| Ba/Ce/Ru ACC                                             | 2         | 673   | 1       | 60000                                                               | 3                              | 2808                                                                                 | 24        |
| Ru-Fe/CNT                                                | 1.67      | 673   | 1       | 24000                                                               | 3                              | 361                                                                                  | 25        |

The figure shows a periodic table with several elements highlighted in green, representing selected secondary promoters. The highlighted elements are: Hydrogen (H), Helium (He), Lithium (Li), Beryllium (Be), Sodium (Na), Magnesium (Mg), Aluminum (Al), Silicon (Si), Phosphorus (P), Sulfur (S), Chlorine (Cl), Argon (Ar), Potassium (K), Calcium (Ca), Scandium (Sc), Titanium (Ti), Vanadium (V), Chromium (Cr), Manganese (Mn), Iron (Fe), Cobalt (Co), Nickel (Ni), Copper (Cu), Zinc (Zn), Gallium (Ga), Germanium (Ge), Arsenic (As), Selenium (Se), Bromine (Br), Krypton (Kr), Rubidium (Rb), Strontium (Sr), Yttrium (Y), Zirconium (Zr), Niobium (Nb), Molybdenum (Mo), Technetium (Tc), Ruthenium (Ru), Rhodium (Rh), Palladium (Pd), Silver (Ag), Cadmium (Cd), Indium (In), Tin (Sn), Antimony (Sb), Tellurium (Te), Iodine (I), Xenon (Xe), Cesium (Cs), Barium (Ba), Lanthanum (La), Cerium (Ce), Praseodymium (Pr), Neodymium (Nd), Promethium (Pm), Samarium (Sm), Europium (Eu), Gadolinium (Gd), Terbium (Tb), Dysprosium (Dy), Holmium (Ho), Erbium (Er), Thulium (Tm), Ytterbium (Yb), and Lutetium (Lu). The actinide series (Ac, Th, Pa, U, Np, Pu, Am, Cm, Bk, Cf, Es, Fm, Md, No, Lr) is also highlighted in green.

Fig. S1. Selected secondary promoters in the search space.

## 1. Details of experimental methods

### 1.1 Catalyst preparation

The praseodymium oxide support was prepared by precipitation of 0.5 M praseodymium nitrate (Sigma Aldrich) dissolved in DI water into ammonium hydroxide solution (Sigma Aldrich). Precipitate was stirred, washed with DI water, dried at room temperature over 4 days, and calcined at 973 K in static air for 5 h.

Promotion of the catalysts was conducted using incipient wetness impregnation of precursors dissolved in DI water. Cobalt nitrate, copper nitrate and lithium acetate were sourced from Acros Organics (Geel, Belgium); nitrates of aluminum, barium, calcium, europium, gallium, gadolinium, holmium, indium, lanthanum, lutetium, nickel, samarium, yttrium, ytterbium and zinc, potassium acetate and scandium acetate were sourced from Alfa Aesar (Ward Hill, MA); nitrates of bismuth, cadmium, dysprosium, erbium, lead, strontium and terbium, acetates of cesium, iridium and sodium, hafnium acetylacetonate, vanadium acetylacetonate and zirconium dinitrate oxide were sources from Fisher Scientific (Waltham, MA); nitrates of silver, cerium, chromium, iron, magnesium, manganese neodymium and thulium, ammonium perrhenate, and tin acetate were sourced from Sigma Aldrich (St Louis, MO); and rubidium acetate was sourced from Strem Chemicals (Newburyport, MA). Catalysts were produced in 2 g samples, before being dried at 393 K and calcined for 1 h at 923 K to remove all ligands.

Ruthenium was added using a triruthenium dodecacarbonyl (Sigma Aldrich) precursor. The ruthenium was dissolved in tetrahydrofuran (Fisher Scientific) and stirred vigorously before the promoted support was added. Once the tetrahydrofuran was evaporated, the samples were transferred to a Lindberg Blue furnace, which was heated under argon (Airgas) to 623 K and held for 3 h to decompose the ruthenium precursor.

## 1.2 Catalyst testing

About 0.2 g of each catalyst were tested in a four-channel parallel reactor, with K-type thermocouples measuring the temperature in each reactor. Each catalyst was tested following a one-hour reduction at 773 K before being cooled under the reaction mixture of hydrogen (Airgas) and nitrogen (Airgas). Hydrogen (60 mL/min) and nitrogen (60 mL/min) were flowed at a 1:1 ratio. Each reactor was independently pressurized to 30 bar and heated between 573 K and 703 K. Effluent was analyzed with Shimadzu GC-2014 fitted with a Restek RTX-VolatileAmine column.

## References

- 1 L. Ward, A. Agrawal, A. Choudhary and C. Wolverton, *npj Comput. Mater.*, 2016, **2**, 1–7.
- 2 L. Ward, A. Dunn, A. Faghaninia, N. E. R. Zimmermann, S. Bajaj, Q. Wang, J. Montoya, J. Chen, K. Bystrom, M. Dylla, K. Chard, M. Asta, K. A. Persson, G. J. Snyder, I. Foster and A. Jain, *Comput. Mater. Sci.*, 2018, **152**, 60–69.
- 3 J. A. Dean, *Lange's Handbook of Chemistry*, McGraw-Hill, Inc., New York, St. Louis, San Francisco., 15th edn., 1999.
- 4 Angstrom Sciences. Elements electrical conductivity reference table.
- 5 A. M. James and M. P. Lord, *Macmillan's Chemical and Physical Data*, Macmillan, London, UK, 1992.
- 6 G. W. C. Kaye and T. H. Laby, *Tables of physical and chemical constants*, Longman, London, UK, 15th edn., 1993.
- 7 G. V. Samsonov, *Handbook of the physicochemical properties of the elements*, IFI-Plenum, New York, USA.
- 8 D. R. Lide, *Chemical Rubber Company handbook of chemistry and physics*, CRC Press, Boca Raton, Florida, USA, 79th edn., 1998.

- 9 H. Ellis, *Nuffield Advanced Science Book of Data*, Longman, London, UK, 1972.
- 10 A. Jain, S. P. Ong, G. Hautier, W. Chen, W. D. Richards, S. Dacek, S. Cholia, D. Gunter, D. Skinner, G. Ceder and K. A. Persson, *APL Mater.*, 2013, **1**, 011002.
- 11 W. Li, S. Wang and J. Li, *Chem. - An Asian J.*, 2019, **14**, 2815–2821.
- 12 K. Sato, K. Imamura, Y. Kawano, S. ichiro Miyahara, T. Yamamoto, S. Matsumura and K. Nagaoka, *Chem. Sci.*, 2016, **8**, 674–679.
- 13 S. ichiro Miyahara, K. Sato, Y. Kawano, K. Imamura, Y. Ogura, K. Tsujimaru and K. Nagaoka, *Catal. Today*, 2021, **376**, 36–40.
- 14 M. Chen, M. Yuan, J. Li and Z. You, *Appl. Catal. A Gen.*, 2018, **554**, 1–9.
- 15 Z. Wang, B. Liu and J. Lin, *Appl. Catal. A Gen.*, 2013, **458**, 130–136.
- 16 R. Javaid and T. Nanba, *ChemistrySelect*, 2020, **5**, 4312–4315.
- 17 Z. Wang, J. Lin, R. Wang and K. Wei, *Catal. Commun.*, 2013, **32**, 11–14.
- 18 M. Kitano, Y. Inoue, Y. Yamazaki, F. Hayashi, S. Kanbara, S. Matsuishi, T. Yokoyama, S. W. Kim, M. Hara and H. Hosono, *Nat. Chem.*, 2012, **4**, 934–940.
- 19 C. J. H. Jacobsen, *J. Catal.*, 2001, **200**, 1–3.
- 20 X. Peng, H. X. Liu, Y. Zhang, Z. Q. Huang, L. Yang, Y. Jiang, X. Wang, L. Zheng, C. Chang, C. T. Au, L. Jiang and J. Li, *Chem. Sci.*, 2021, **12**, 7125–7137.
- 21 Y. Tang, Y. Kobayashi, N. Masuda, Y. Uchida, H. Okamoto, T. Kageyama, S. Hosokawa, F. Loyer, K. Mitsuhashi, K. Yamanaka, Y. Tamenori, C. Tassel, T. Yamamoto, T. Tanaka and H. Kageyama, *Adv. Energy Mater.*, DOI:10.1002/aenm.201801772.
- 22 L. Li, T. Zhang, J. Cai, H. Cai, J. Ni, B. Lin, J. Lin, X. Wang, L. Zheng, C. T. Au and L. Jiang, *J. Catal.*, 2020, **389**, 218–228.
- 23 Y. Ogura, K. Sato, S. I. Miyahara, Y. Kawano, T. Toriyama, T. Yamamoto, S. Matsumura, S. Hosokawa and K. Nagaoka, *Chem. Sci.*, 2018, **9**, 2230–2237.
- 24 L. Li, Y. F. Jiang, T. Zhang, H. Cai, Y. Zhou, B. Lin, X. Lin, Y. Zheng, L. Zheng, X. Wang, C. Q. Xu, C. tong Au, L. Jiang and J. Li, *Chem*, 2022, **8**, 749–768.
- 25 C. Chen, Y. Chen, A. M. Ali, W. Luo, J. Wen, L. Zhang and H. Zhang, *Chem. Eng. & Technol.*, 2020, **43**, 719–730.
